# Supplementary material for: Polarity control and enhanced luminescence characteristics of semi-polar ZnO nanostructures grown on non-polar MgO(100) substrates
Source: Royal Society of Chemistry journal article supplement (doi:10.1039/c6ra21529g), 2016-01-01
Supplement: c6ra21529g1.pdf [file c6ra21529g1.pdf]

## Polarity control and enhanced luminescence characteristics of semi-polar ZnO nanostructures grown on non-polar MgO (100) substrates†

Ramanjaneyulu Mannam<sup>1</sup>, F. Bellarmine<sup>1</sup>, E. Senthil Kumar<sup>2</sup>, Nandita DasGupta<sup>3</sup> and M. S. Ramachandra Rao<sup>1\*</sup>

<sup>1</sup>Department of Physics, Nano Functional Materials Technology Centre and Materials Science Research Centre,  
Indian Institute of Technology Madras, Chennai-600036, India

<sup>3</sup>SRM Research Institute & Department of Physics, SRM University, kattankulathur – 603203,  
Tamil Nadu, India

<sup>2</sup>Microelectronics and MEMS Laboratory, Electrical Engineering Department, Indian Institute of Technology  
Madras, Chennai-600036, India

[\\*msrrao@iitm.ac.in](mailto:msrrao@iitm.ac.in) & [ramu.nov9@gmail.com](mailto:ramu.nov9@gmail.com)

### Appendix A. SUPPORTING INFORMATION:

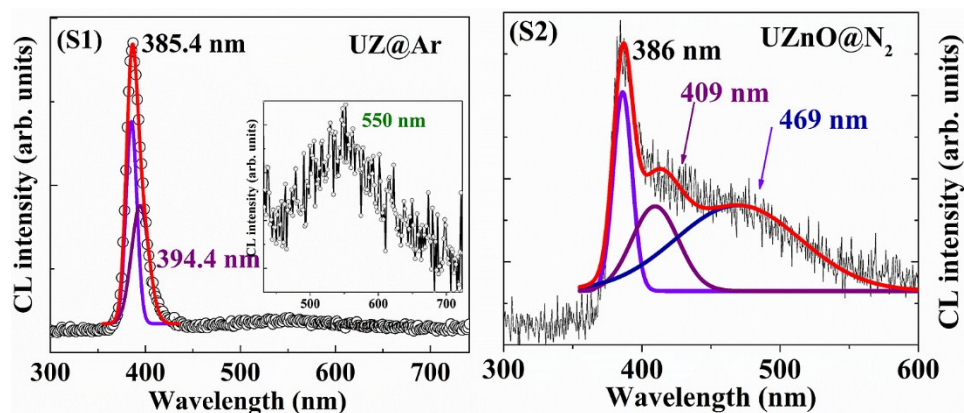

Figure S CL spectra of undoped ZnO nanostructures grown under both Ar and N<sub>2</sub> gas ambient.
